# Supplementary material for: Rewritable wavelength-selective hydrogel actuators grafted with fluorophores
Source: Royal Society of Chemistry journal article supplement (doi:10.1039/d4mh01294a), 2024-12-30
Supplement: d4mh01294a4.pdf [file d4mh01294a4.pdf]

## Supplementary Information

### **Rewritable Wavelength-Selective Hydrogel Actuators Grafted with Fluorophores**

Hye Been Koo,<sup>a</sup> Haemin Yeon,<sup>a</sup> Young Bin Yoon,<sup>a</sup> Taek-Jun Lee,<sup>b</sup> Young-Tae Chang,<sup>bc</sup> Jae-Byum Chang<sup>\*ad</sup>

<sup>a</sup> *Department of Materials Science and Engineering, Korea Advanced Institute of Science and Technology (KAIST), Daejeon, Republic of Korea*

<sup>b</sup> *Department of Chemistry, Pohang University of Science and Technology, Pohang, Republic of Korea*

<sup>c</sup> *Molecular Imaging Center, Pohang University of Science and Technology, Pohang, Republic of Korea*

<sup>d</sup> *Department of Biological Sciences, Korea Advanced Institute of Science and Technology, Daejeon, Korea*

*\*Corresponding author: [jbchang03@kaist.ac.kr](mailto:jbchang03@kaist.ac.kr)*

**a 405 nm irradiation**

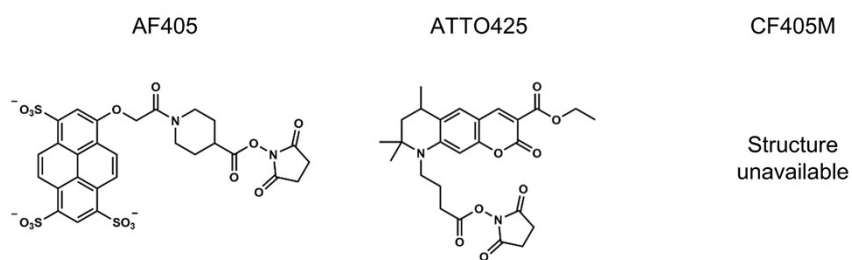

**b 520 nm irradiation**

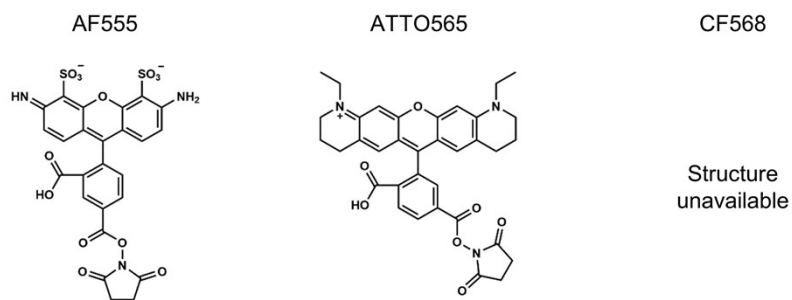

**c 638 nm irradiation**

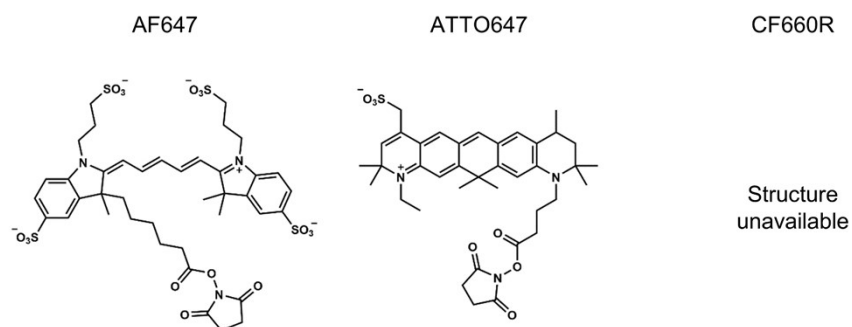

**Figure S1.** Chemical structures of commercially available fluorophores for a) 405 nm, b) 520 nm, and c) 638 nm laser irradiation.

**a 405 nm irradiation**

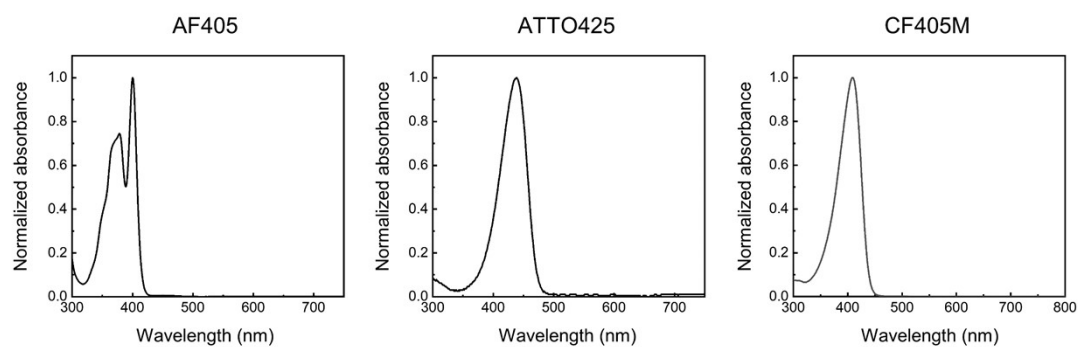

**b 520 nm irradiation**

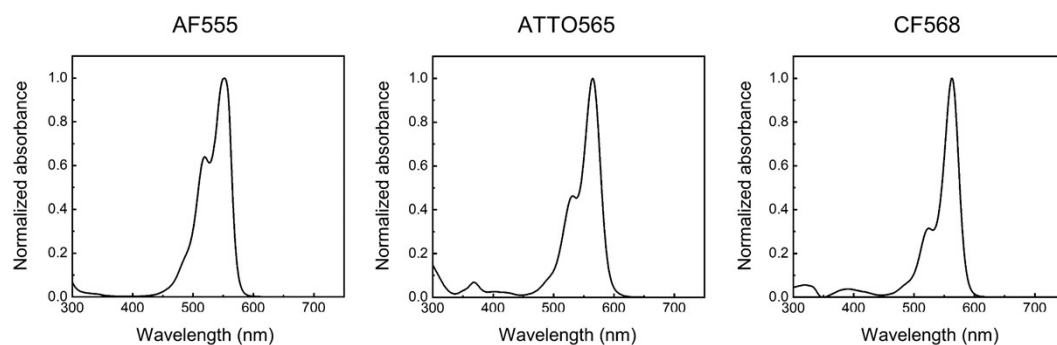

**c 638 nm irradiation**

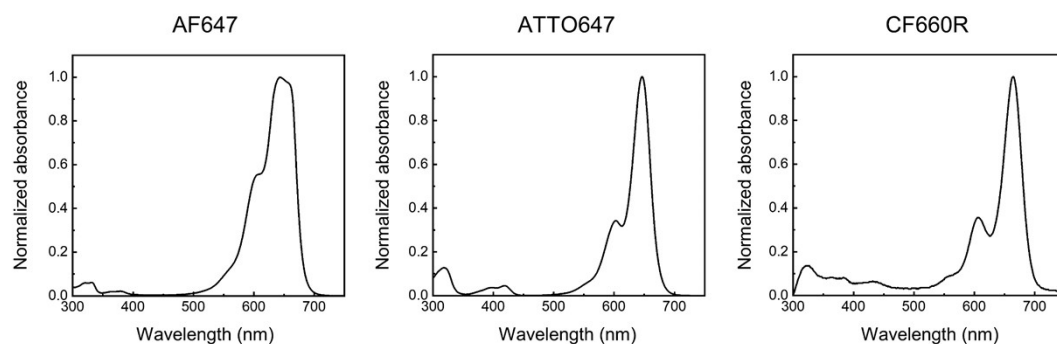

**Figure S2.** UV-VIS absorption spectra of commercially available fluorophores grafted onto P(NIPAM-*co*-allylamine) hydrogels for a) 405 nm, b) 520 nm, and c) 638 nm laser irradiation.

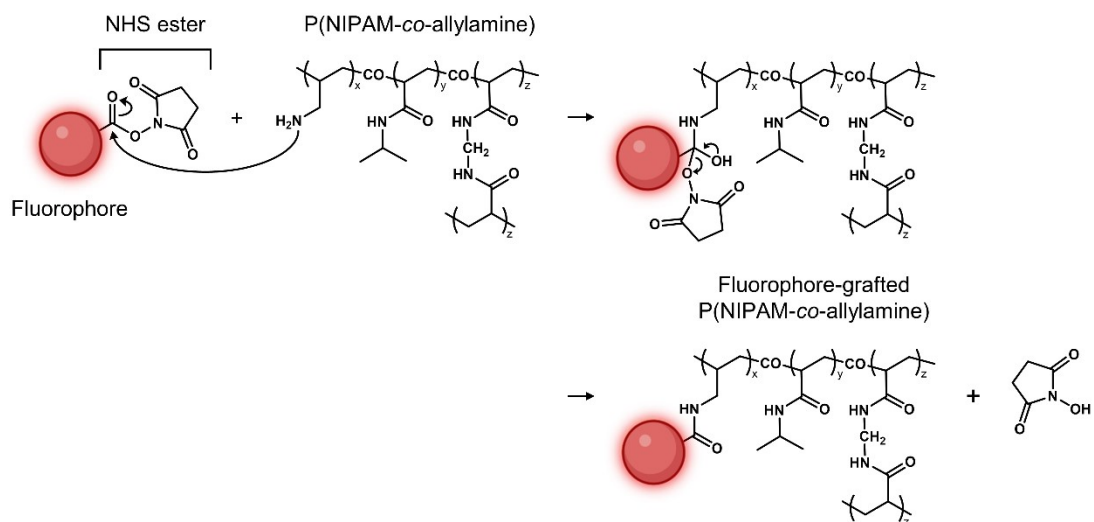

**Figure S3.** The chemical mechanism of fluorophore grafting in hydrogels for the writing process.

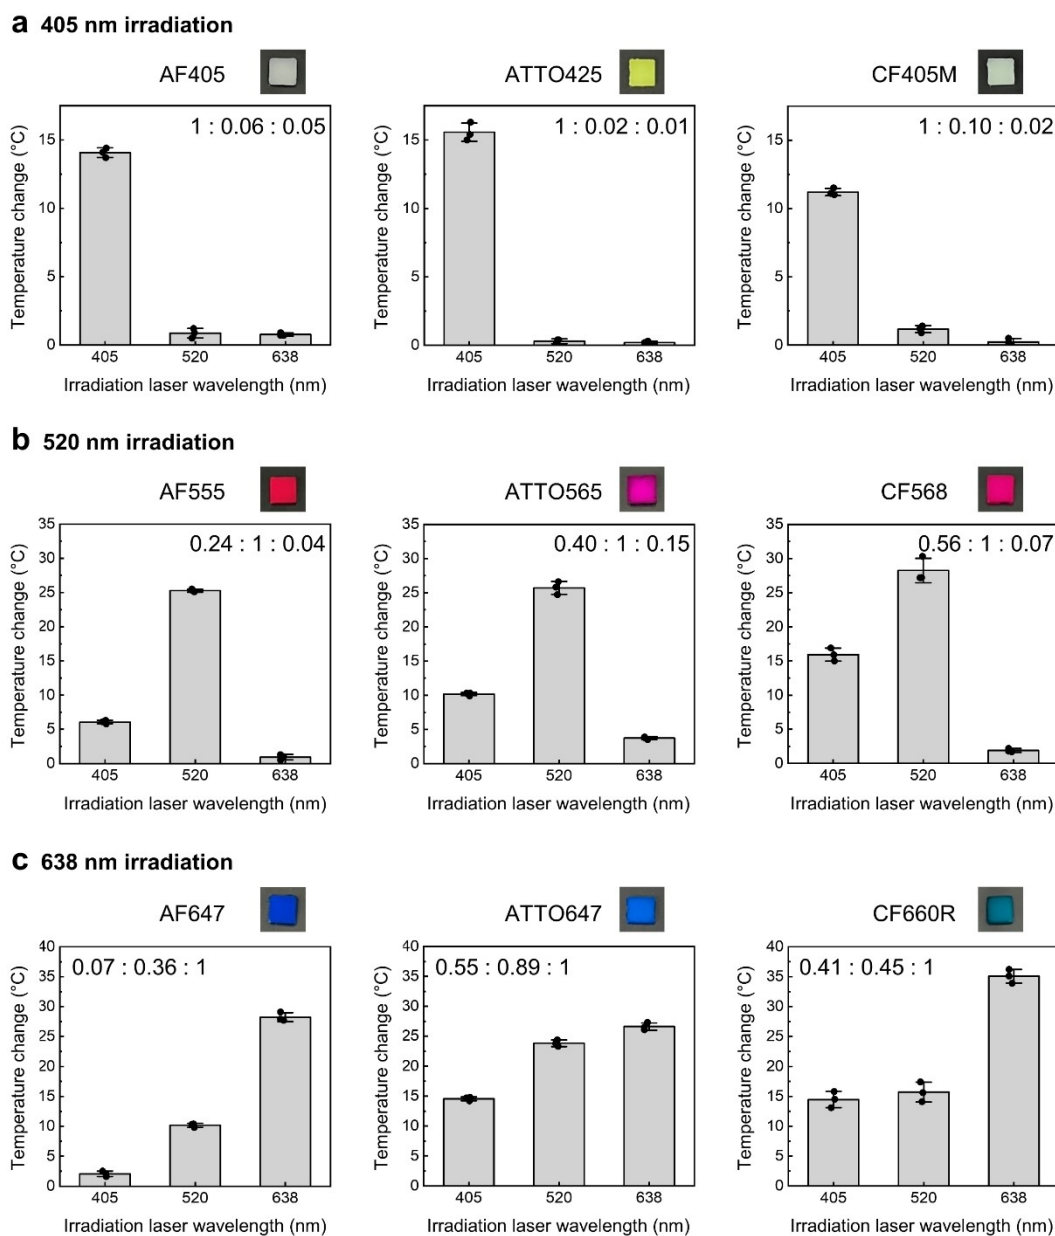

**Figure S4.** Photothermal effects of commercially available fluorophores under stimulation of lasers with wavelengths of a) 405 nm, b) 520 nm, and c) 638 nm. All data are shown as mean  $\pm$  s.d. of three independent samples.

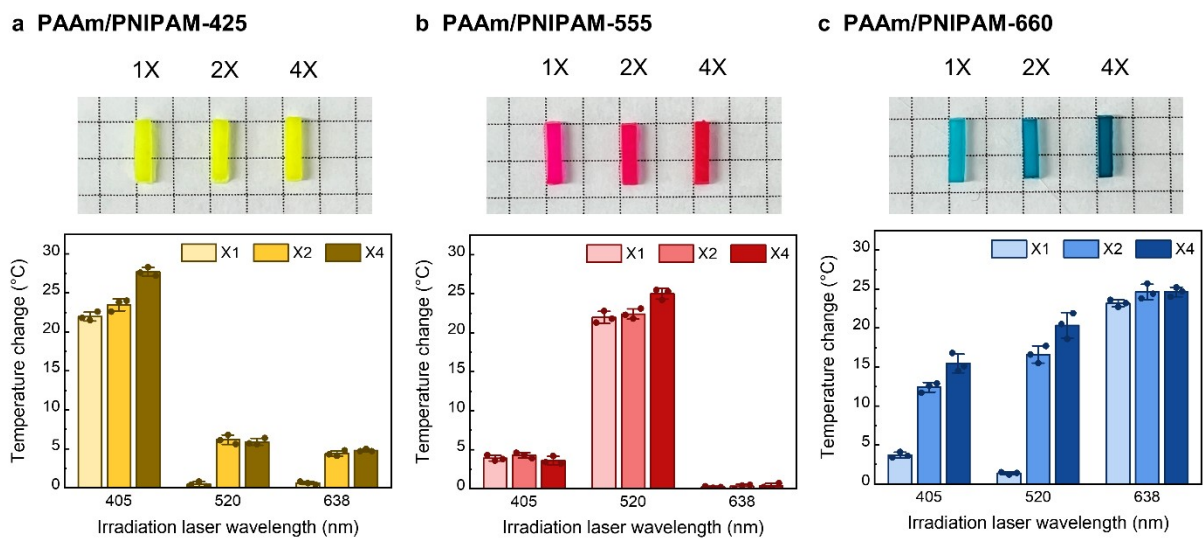

**Figure S5.** Maximum temperature change of a) PAAm/PNIPAM-425, b) PAAm/PNIPAM-555, and c) PAAm/PNIPAM-660 at optimized fluorophore concentrations of 1X, 2X, and 4X under laser stimulation at wavelengths of 405, 520, and 638 nm. All data are shown as mean  $\pm$  s.d. of three independent samples.

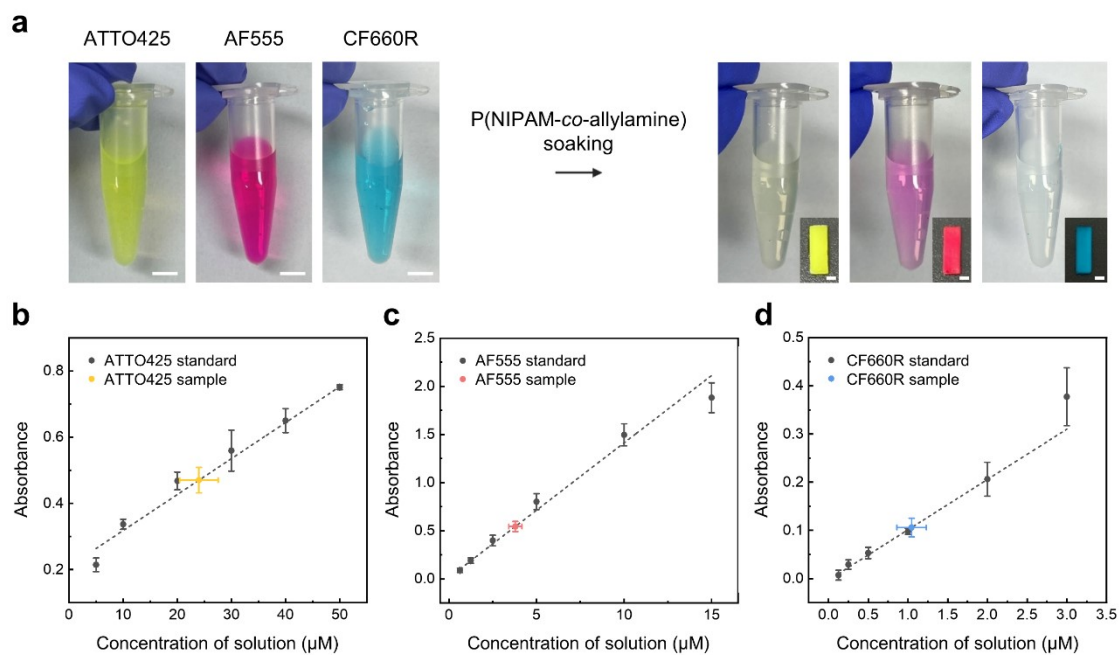

**Figure S6.** a) Photographs of three fluorophore solutions before and after P(NIPAM-co-allylamine) hydrogels. Beer-Lambert calibration curves for b) ATTO425 at 425 nm, c) AF555 at 555 nm, and d) CF660R at 660 nm. All data are shown as mean  $\pm$  s.d. of three independent samples.

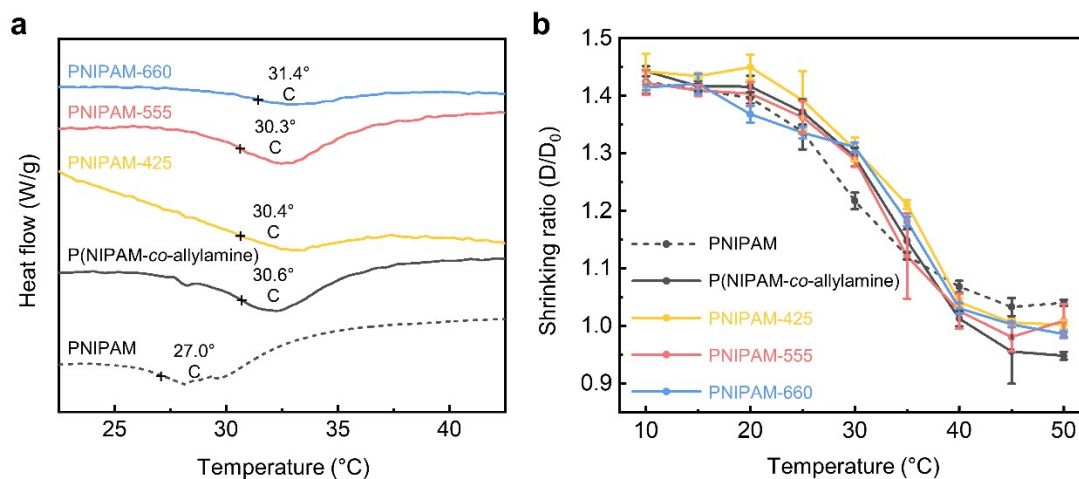

**Figure S7.** a) DSC curves and b) shrinking ratios as a function of the temperature of PNIPAM, P(NIPAM-co-allylamine), and fluorophore-grafted P(NIPAM-co-allylamine) hydrogels. Data for shrinking ratios are shown as mean  $\pm$  s.d. of three independent samples.



**a** PNIPAM-425

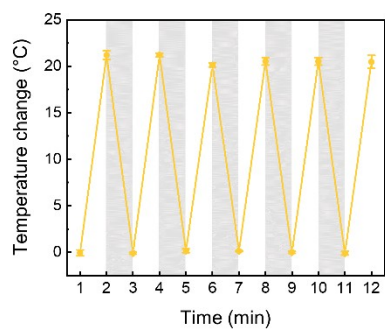

**b** PNIPAM-555

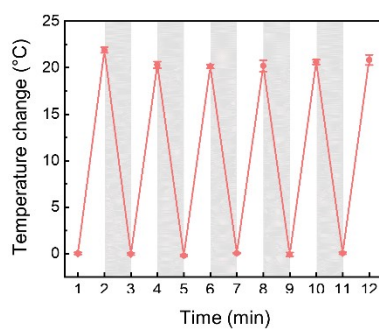

**c** PNIPAM-660

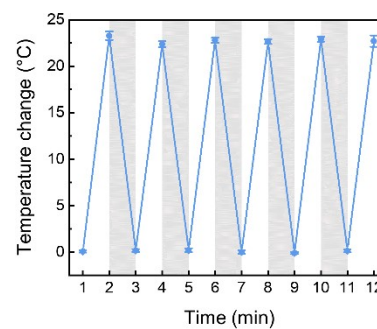

**Figure S8.** Heating and cooling of fluorophore-grafted hydrogels in multiple irradiation cycles with a) 405 nm, b) 520 nm, and c) 638 nm lights. The 1 min non-irradiation periods are indicated in gray. All data are shown as mean  $\pm$  s.d. of three independent samples.

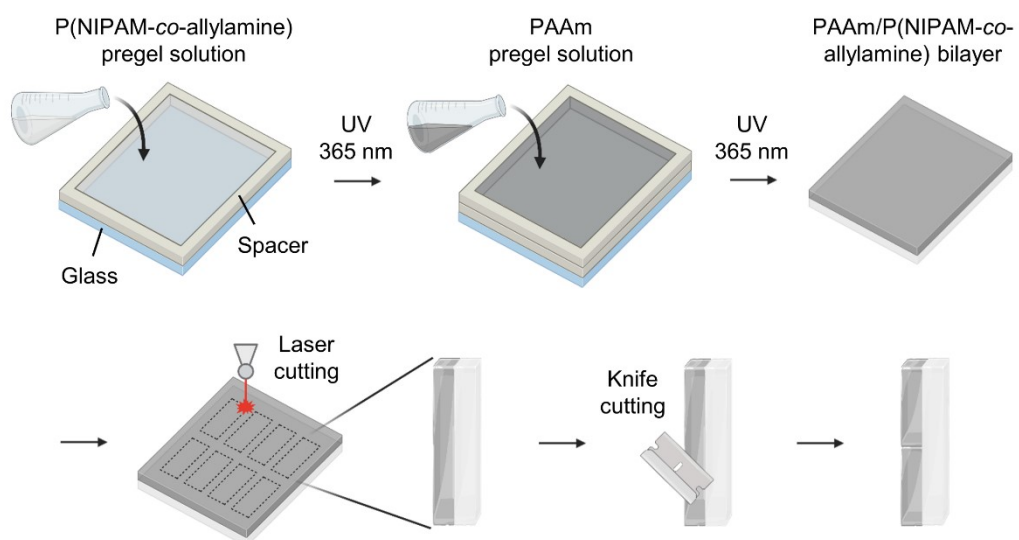

**Figure S9.** Schematic illustration of the fabrication process of PAAm/P(NIPAM-co-allylamine) hydrogel bilayers.

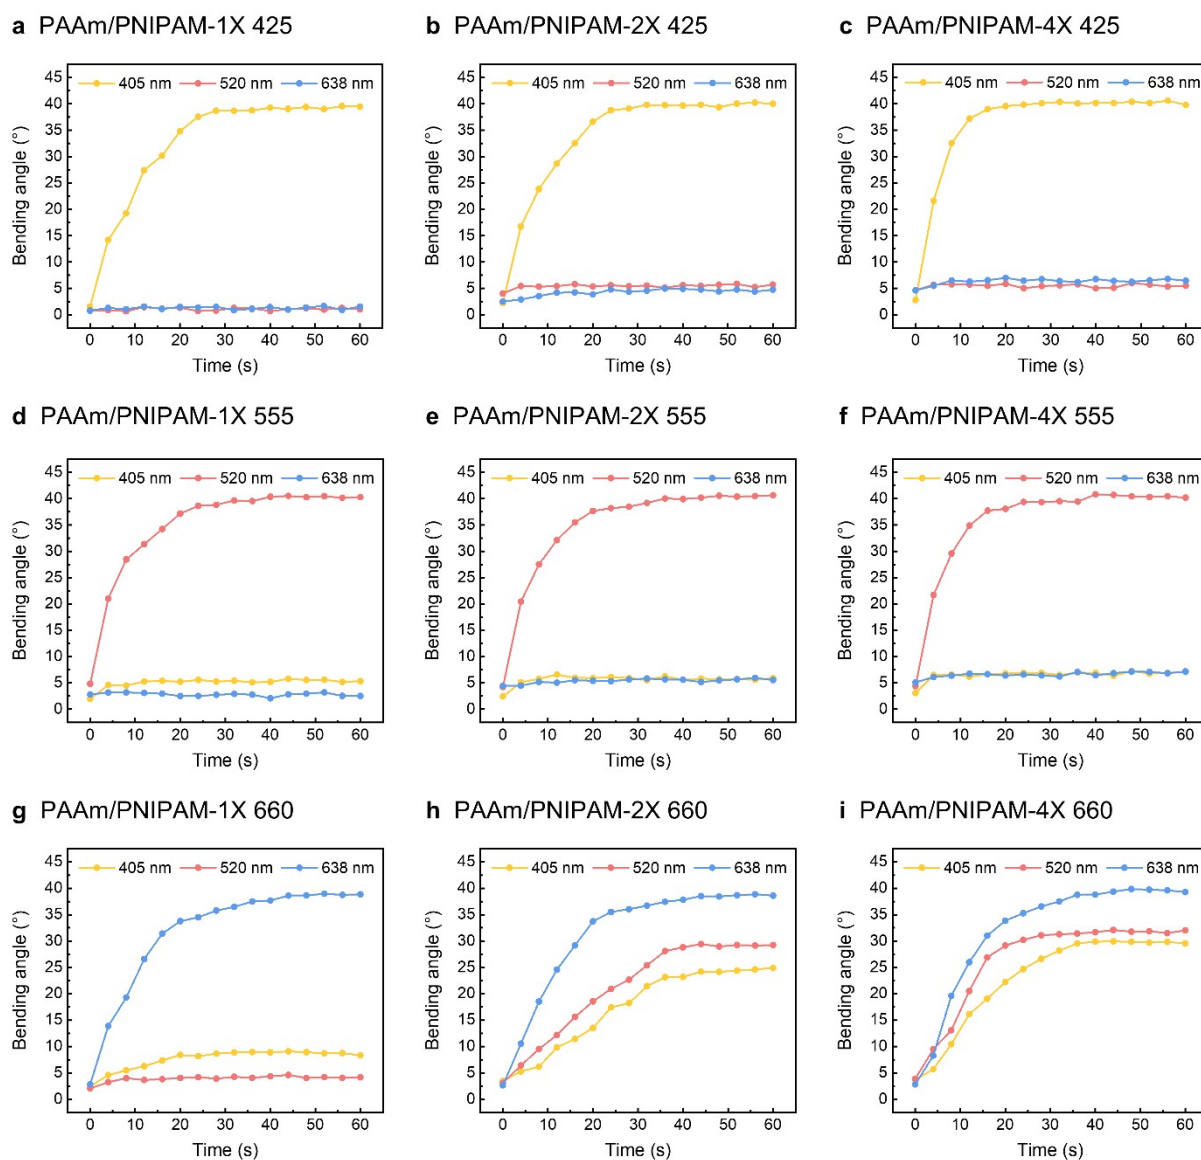

**Figure S10.** Bending angle responses of PAAm/PNIPAM hydrogels with varying fluorophore concentrations (1X, 2X, and 4X) under laser irradiation at 405 nm, 520 nm, and 638 nm. a–c) PAAm/PNIPAM-425 with ATTO425 at 1X, 2X, and 4X concentrations. d–f) PAAm/PNIPAM-555 with AF555 at 1X, 2X, and 4X concentrations. g–i) PAAm/PNIPAM-660 with CF660R at 1X, 2X, and 4X concentrations. All data presented were obtained from a single sample for each condition.

**a** PAAm/PNIPAM-425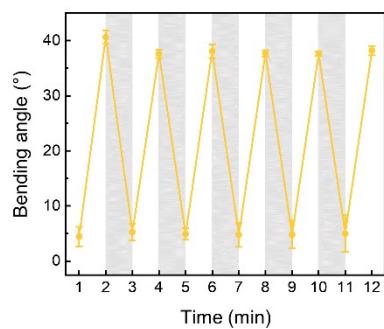**b** PAAm/PNIPAM-555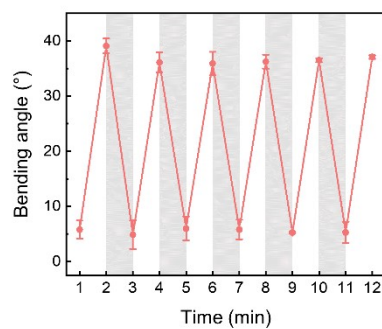**c** PAAm/PNIPAM-660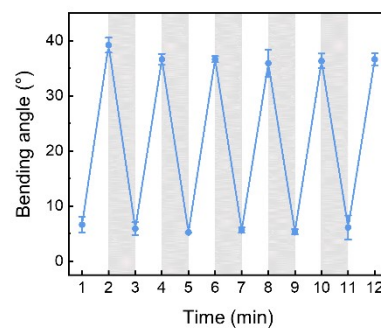

**Figure S11.** Bending and recovery of fluorophore-grafted hydrogel bilayers in multiple actuation cycles upon irradiation with a) 405 nm, b) 520 nm, and c) 638 nm lights. The 1 min non-irradiation periods are indicated in gray. All data are shown as mean  $\pm$  s.d. of three independent samples.

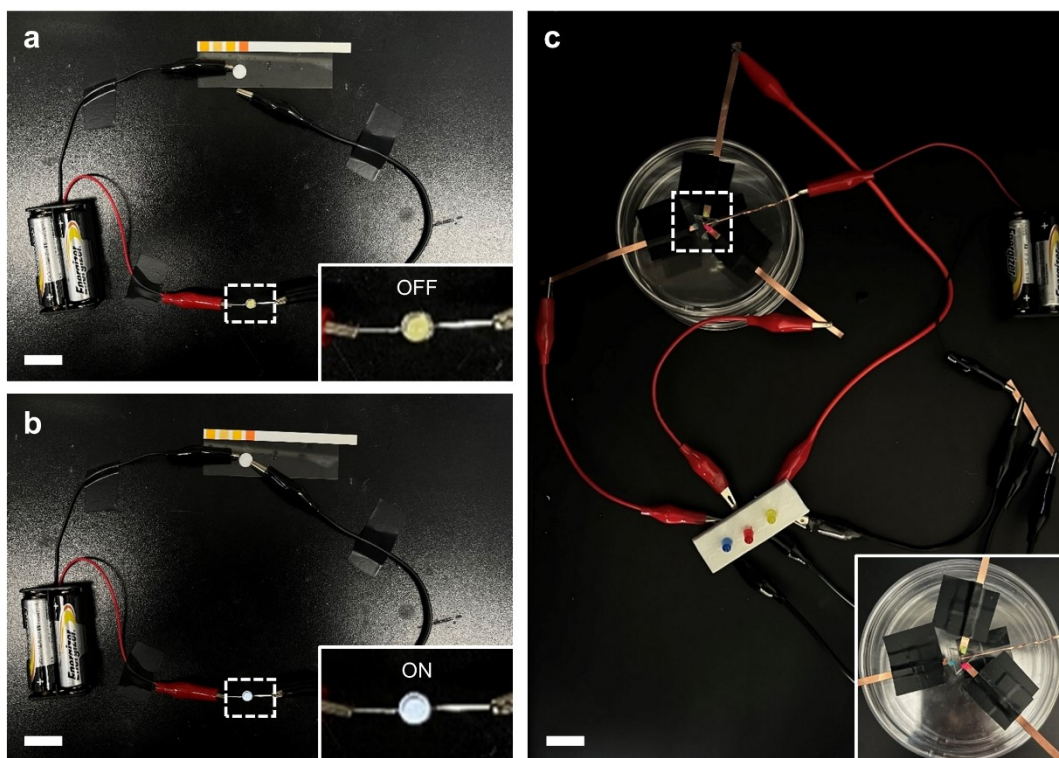

**Figure S12.** a) Non-ionic conductivity for the P(NIPAM-*co*-allylamine) hydrogel without lighting an LED. b) Ionic conductivity for the P(NIPAM-*co*-allylamine) hydrogels after soaking in 0.1M  $\text{KH}_2\text{PO}_4$  at pH 7.4 with lighting an LED. c) Photograph of a circuit for a demonstration of fluorophore-grafted hydrogel bilayers as wavelength-selective switches.

**a** ATTO425 NHS ester

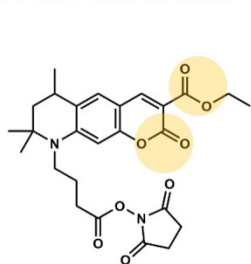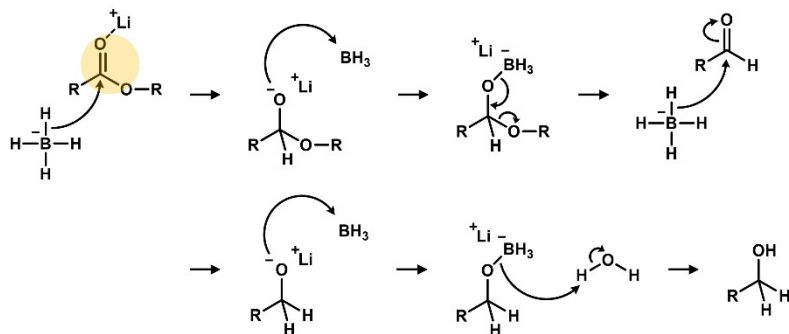

**b** AF555 NHS ester

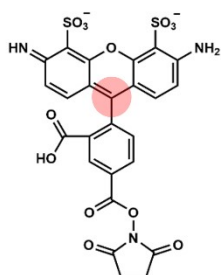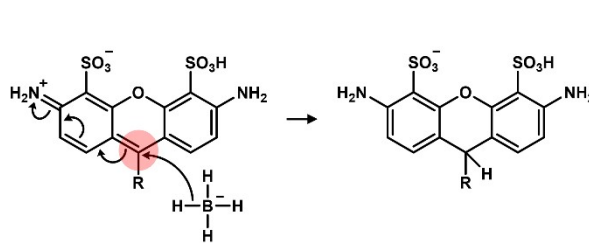

**Figure S13.** The chemical mechanisms of a) the reduction of the ester group in ATTO425 and b) the hydrogen transfer reaction in AF555 upon  $\text{LiBH}_4$  treatment.

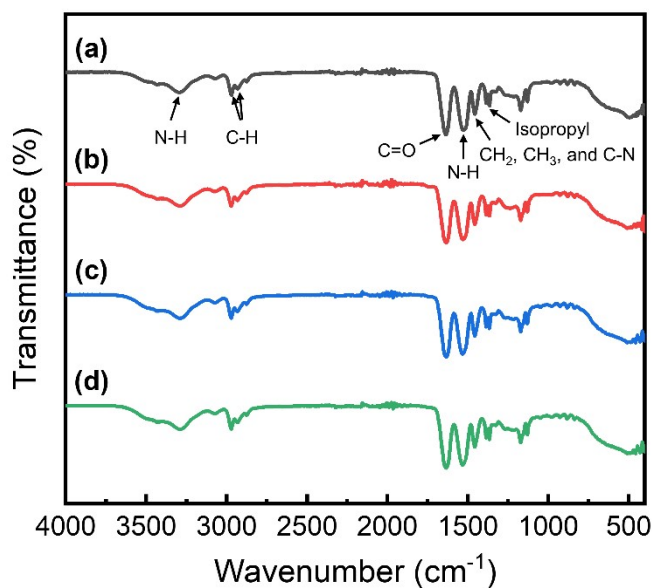

**Figure S14.** The ATR-FTIR spectra of a) PNIPAM-425 before bleaching, b) PNIPAM-425 after bleaching, c) PNIPAM-555 before bleaching, and d) PNIPAM-555 after bleaching.

The characteristic vibration band at  $1635\text{ cm}^{-1}$  indicates N–H groups and C=O stretching in the NIPAM units of the copolymer. The peak around  $1455\text{ cm}^{-1}$  corresponds to  $\text{CH}_3$  antisymmetric bending,  $\text{CH}_2$  scissoring, and C–N stretching of the amide groups, while the  $1365\text{ cm}^{-1}$  peak is attributed to the symmetric bending of the isopropyl groups from PNIPAM. Peaks at  $2972\text{ cm}^{-1}$  and  $2935\text{ cm}^{-1}$  indicate the C–H stretching of alkyl carbons. The  $3292\text{ cm}^{-1}$  peak represents the N–H bending of amine groups, and the strong band at  $1531\text{ cm}^{-1}$  corresponds to the N–H stretching of allylamine groups.

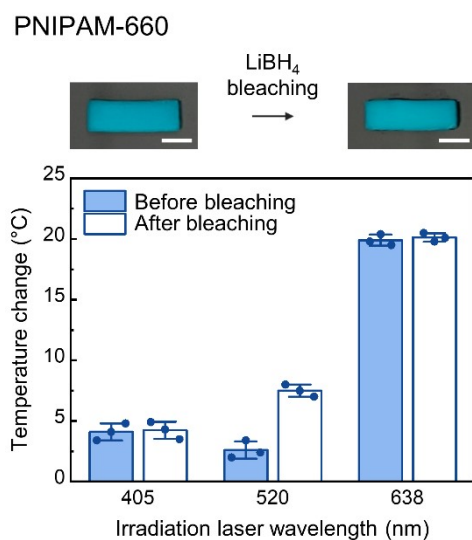

**Figure S15.** Photograph and the change in the photothermal effect of PNIPAM-660 hydrogels under 405 nm, 520 nm, and 638 nm light illumination before and after chemical bleaching. Data are shown as mean  $\pm$  s.d. of three independent samples.



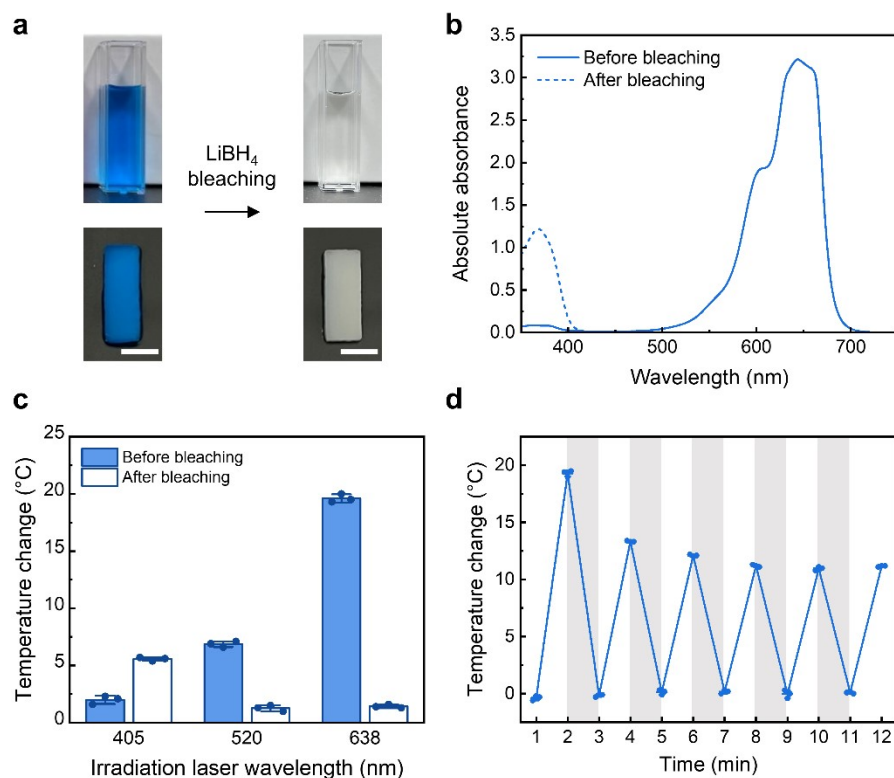

**Figure S16.** a) Photographs of the fluorophore solution and PNIPAM-647 hydrogel with AF647 before and after bleaching. b) UV–VIS absorption spectra of PNIPAM-647 before and after bleaching. c) Photothermal effects of PNIPAM-647 under the stimulation of lasers with wavelengths of 405 nm, 520 nm, and 638 nm. d) Heating and cooling of PNIPAM-647 in multiple irradiation cycles at 638 nm. All data are presented as mean  $\pm$  s.d. of three independent samples.

**a** PAAm/PNIPAM-425

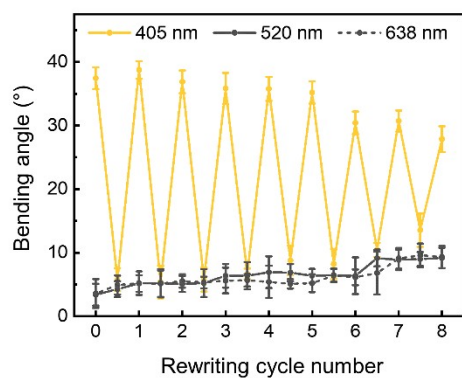

**b** PAAm/PNIPAM-555

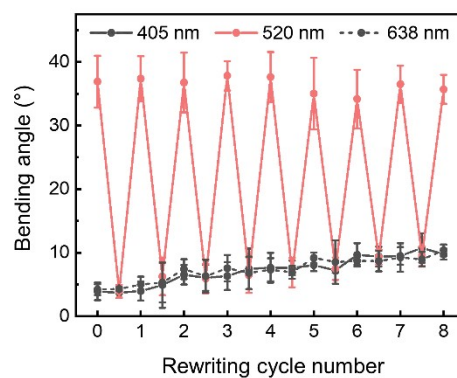

**Figure S17.** For sequential multiple rewriting processes, the variations in bending angles of a) PAAm/PNIPAM-425 and b) PAAm/PNIPAM-555 bilayers under the stimulation of lasers with wavelengths of 405, 520, and 638 nm. All data are shown as mean  $\pm$  s.d. of three independent samples.

**a** PAAm/PNIPAM-425

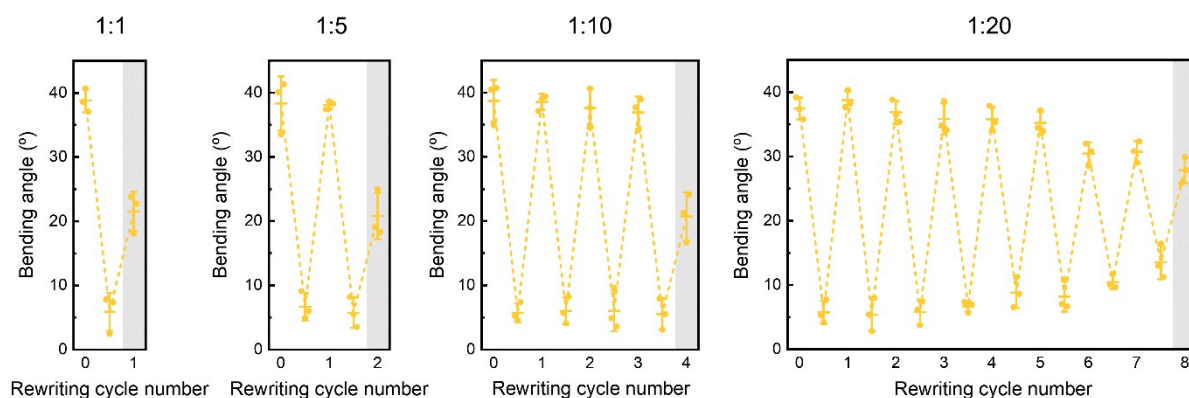

**b** PAAm/PNIPAM-555

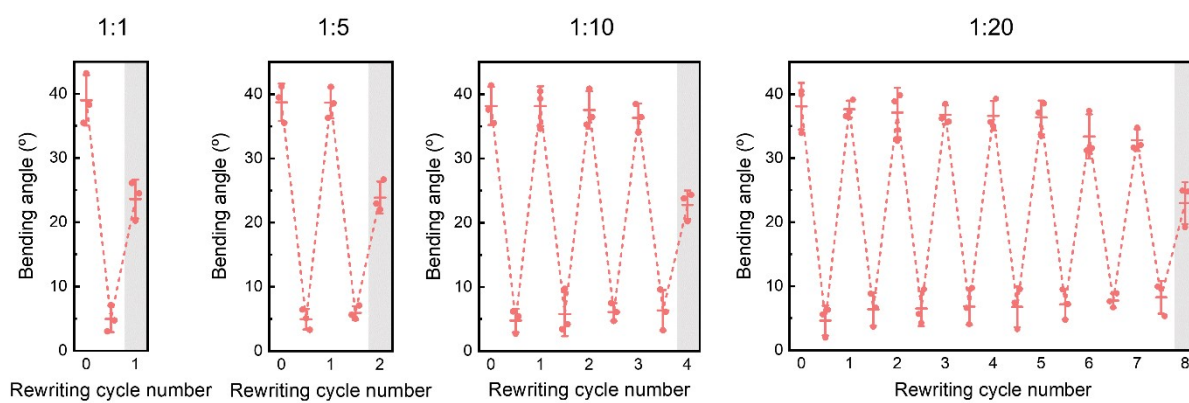

**Figure S18.** The rewritable cycle numbers of a) PAAm/PNIPAM-425 and b) PAAm/PNIPAM-555 bilayers with different molar ratios of fluorophores to allylamine. All data are presented as mean  $\pm$  s.d. of three independent samples.

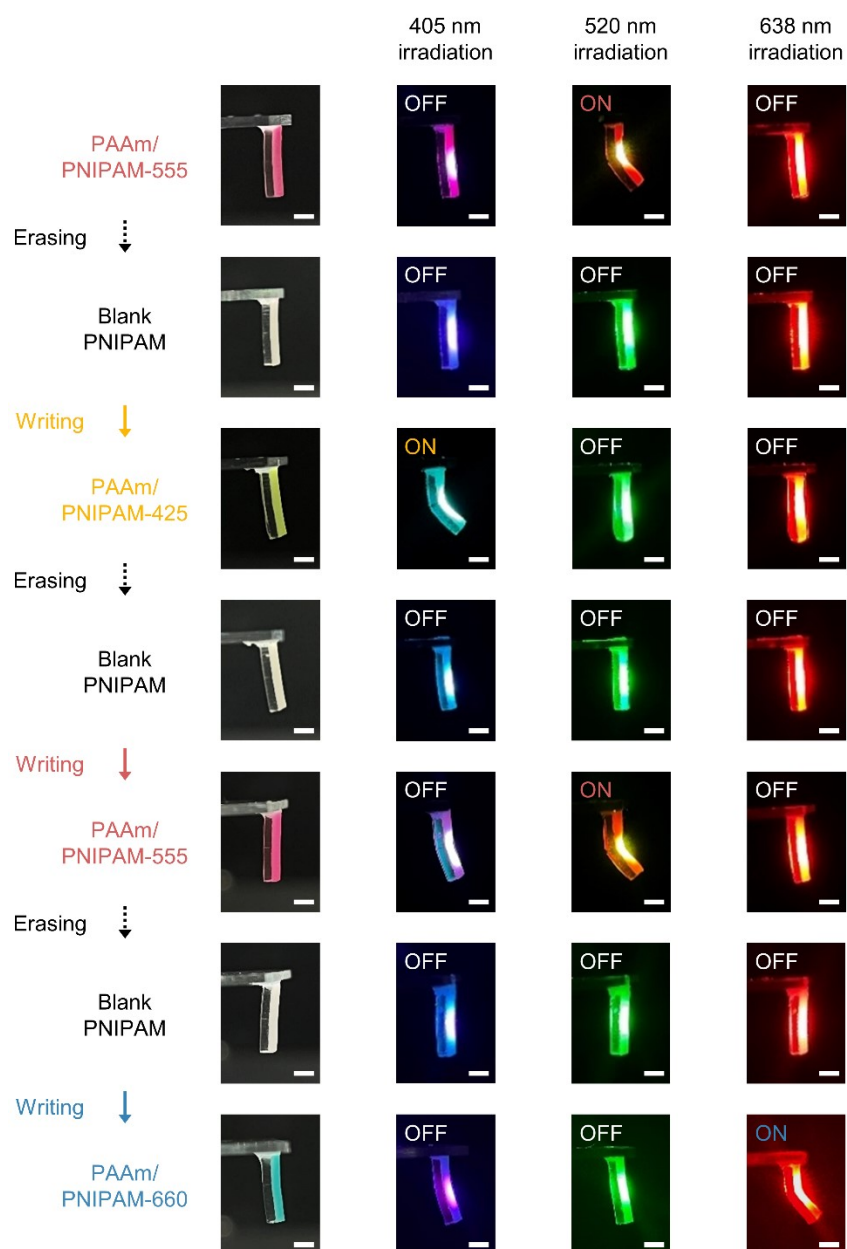

**Figure S19.** For sequential multiple rewriting processes, photographs of a single bilayer under the stimulation of lasers with wavelengths of 405, 520, and 638 nm in each rewriting.

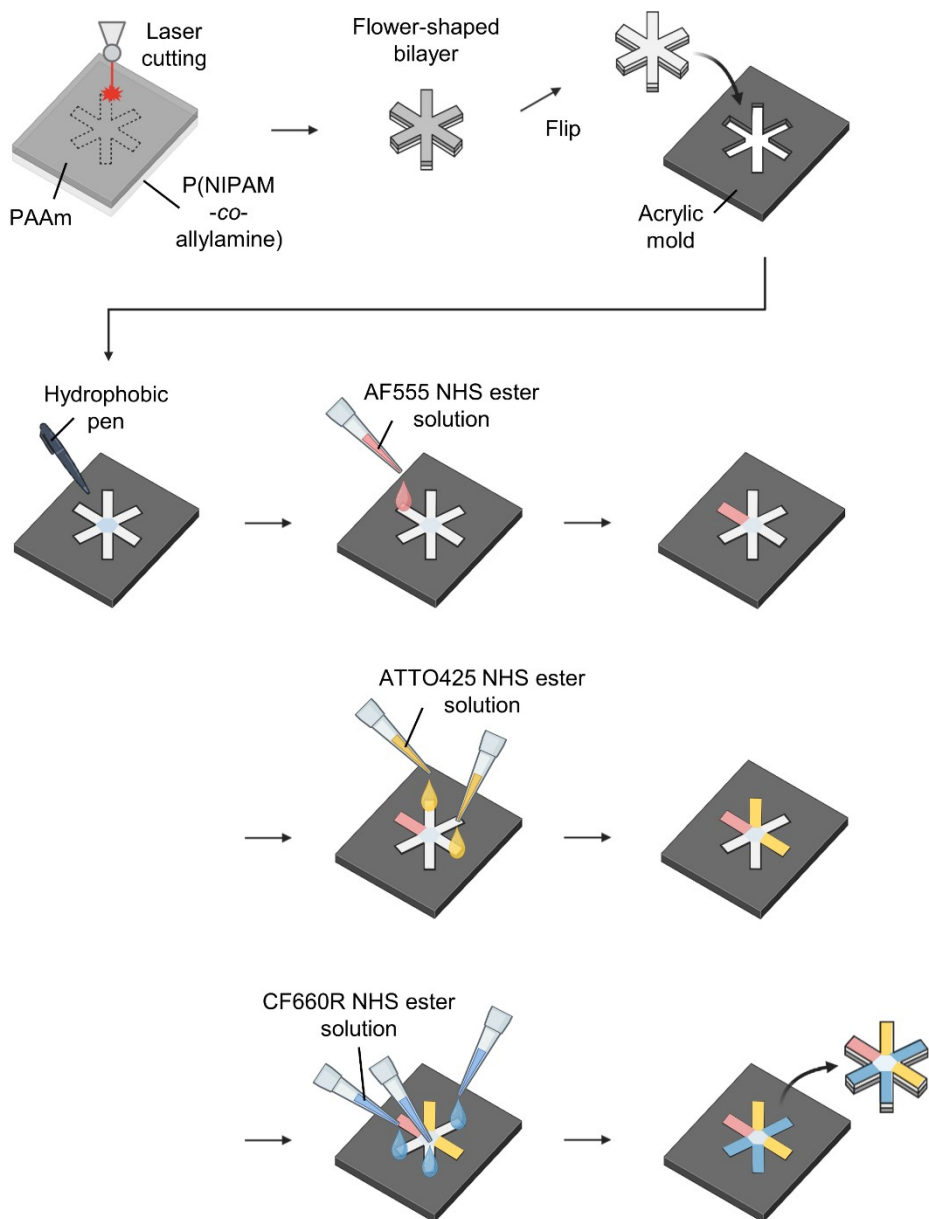

**Figure S20.** Schematic illustration of the fabrication process for flower-shaped hydrogel actuators grafted with three fluorophores.

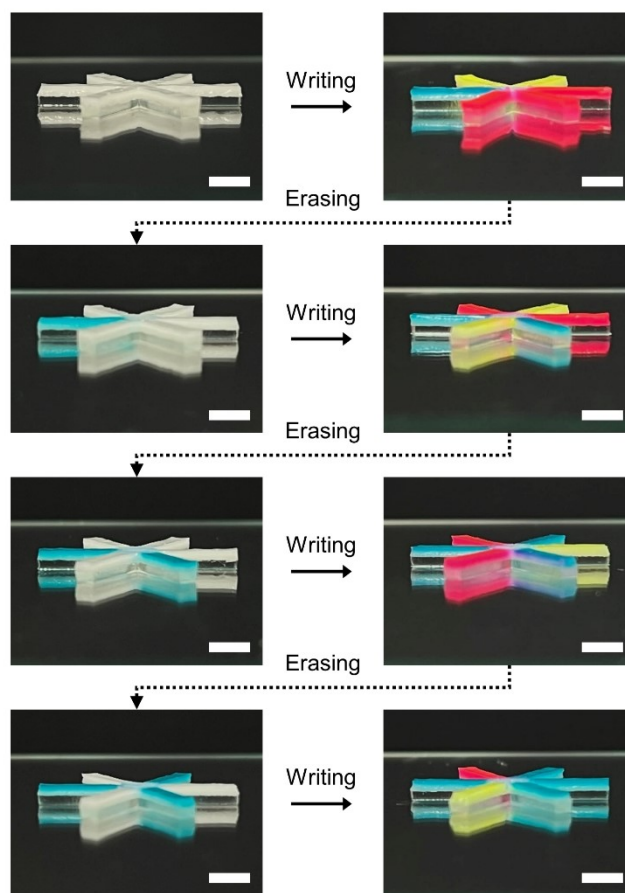

**Figure S21.** For sequential multiple rewriting processes, photographs of a single flower-shaped hydrogel actuator in each writing and erasing process.

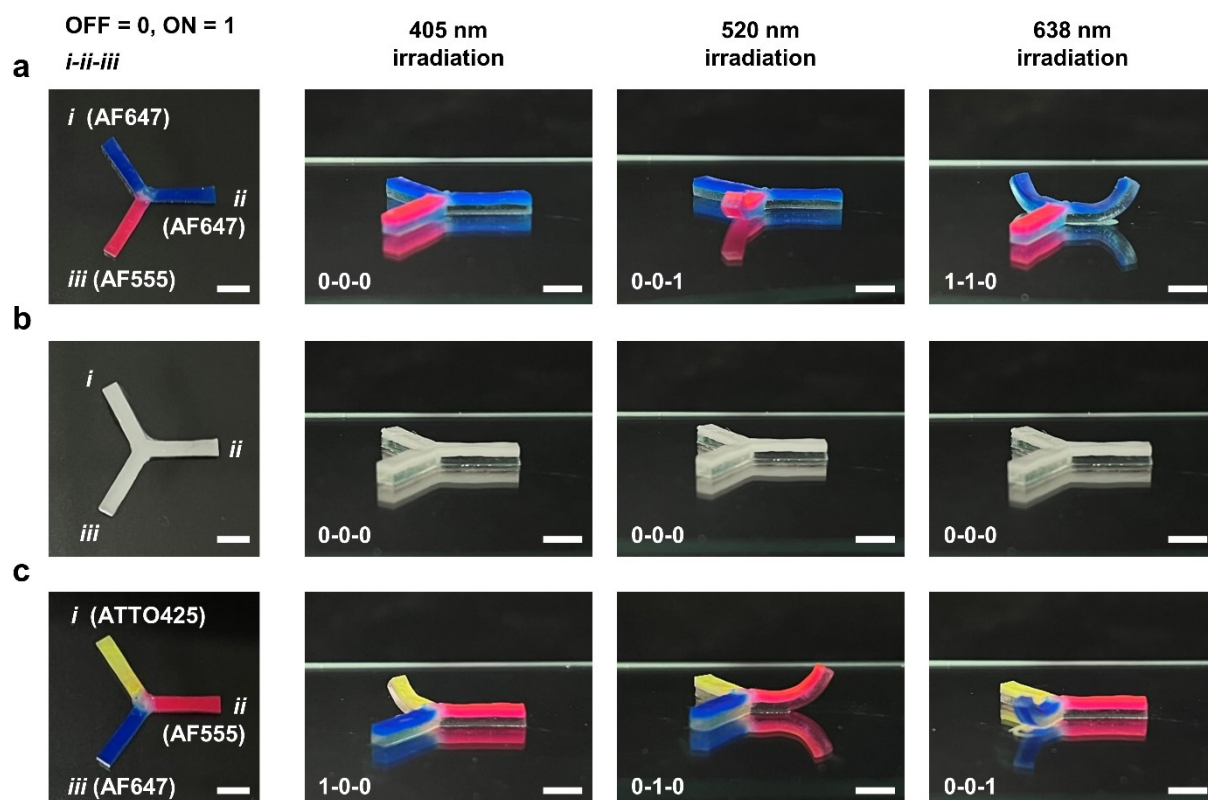

**Figure S22.** Three rewritable wavelength-selective hydrogel actuators in a three-petal flower shape grafted with ATTO425, AF555, and AF647. Photographs of wavelength-selective photoactuation from a single hydrogel actuator after a) writing, b) erasing, and c) rewriting via sequential rewriting processes. The three leaves of the resulting flower-shaped hydrogel actuator were designated *i*, *ii*, and *iii* in clockwise order, with the initial unbent state defined as 0 and the bent state after laser irradiation defined as 1.

**Table S1.** Multiple configurations of a single flower-shaped hydrogel actuator via iterative rewriting processes. Note that ON denotes the bending deformation, and OFF denotes the initial state.

| Number of writing | Irradiation laser wavelength | <i>i</i> | <i>ii</i> | <i>iii</i> | <i>iv</i> | <i>v</i> | <i>vi</i> |
|-------------------|------------------------------|----------|-----------|------------|-----------|----------|-----------|
| 1st               | 405 nm                       | OFF      | ON        | ON         | OFF       | OFF      | OFF       |
| 1st               | 520 nm                       | OFF      | OFF       | OFF        | ON        | ON       | ON        |
| 1st               | 638 nm                       | ON       | OFF       | OFF        | OFF       | OFF      | OFF       |
| 2nd               | 405 nm                       | OFF      | OFF       | ON         | OFF       | OFF      | ON        |
| 2nd               | 520 nm                       | OFF      | ON        | OFF        | ON        | OFF      | OFF       |
| 2nd               | 638 nm                       | ON       | OFF       | OFF        | OFF       | ON       | OFF       |
| 3rd               | 405 nm                       | OFF      | OFF       | OFF        | ON        | OFF      | OFF       |
| 3rd               | 520 nm                       | OFF      | ON        | OFF        | OFF       | OFF      | ON        |
| 3rd               | 638 nm                       | ON       | OFF       | ON         | OFF       | ON       | OFF       |
| 4th               | 405 nm                       | OFF      | OFF       | OFF        | OFF       | OFF      | ON        |
| 4th               | 520 nm                       | OFF      | ON        | OFF        | OFF       | OFF      | OFF       |
| 4th               | 638 nm                       | ON       | OFF       | ON         | ON        | ON       | OFF       |



**Movie S1.** Bending and recovery of the PAAm/PNIPAM-425 bilayer under 405, 520, and 638 nm irradiation.

**Movie S2.** Bending and recovery of the PAAm/PNIPAM-555 bilayer under 405, 520, and 638 nm irradiation.

**Movie S3.** Bending and recovery of the PAAm/PNIPAM-660 bilayer under 405, 520, and 638 nm irradiation.
